# Supplementary material for: High-yielding preparation of hierarchically branched carbon nanotubes derived from zeolitic imidazolate frameworks for enhanced electrochemical K+ storage
Source: Royal Society of Chemistry journal article supplement (doi:10.1039/d2dt00377e), 2022-01-01
Supplement: d2dt00377e1.pdf [file d2dt00377e1.pdf]

## Supporting information

### High-Yielding Preparation of Hierarchically Branched Carbon Nanotubes Derived from Zeolitic Imidazolate Frameworks for Enhanced Electrochemical K<sup>+</sup> Storage

*Dongbo Yu<sup>a,b,c</sup>, Fei Wang<sup>a</sup>, Jie Wang<sup>a</sup>, Qingliang Gao<sup>a</sup>, Jiaqin Liu<sup>b,c,\*</sup>, Gang Qian<sup>d,\*</sup>,  
Yong Zhang<sup>a,b,c</sup>, Yucheng Wu<sup>a,b,c</sup>, Jiewu Cui<sup>a,b,c,\*</sup>*

<sup>a</sup> School of Materials Science and Engineering, Hefei University of Technology,  
Hefei 230009, Anhui, China

<sup>b</sup> China International S&T Cooperation Base for Advanced Energy and  
Environmental Materials & Anhui Provincial International S&T Cooperation Base for  
Advanced Energy Materials, Hefei 230009, Anhui, China

<sup>c</sup> Key Laboratory of Advanced Functional Materials and Devices of Anhui Province,  
Hefei 230009, Anhui, China

<sup>d</sup> Instrumental Analysis Center, Hefei University of Technology, Hefei 230009, Anhui,  
China

Email Address: jqliu@hfut.edu.cn (Jiaqin Liu); qiangang.qg@163.com (Gang Qian);  
jwcui@hfut.edu.cn (Jiewu Cui);

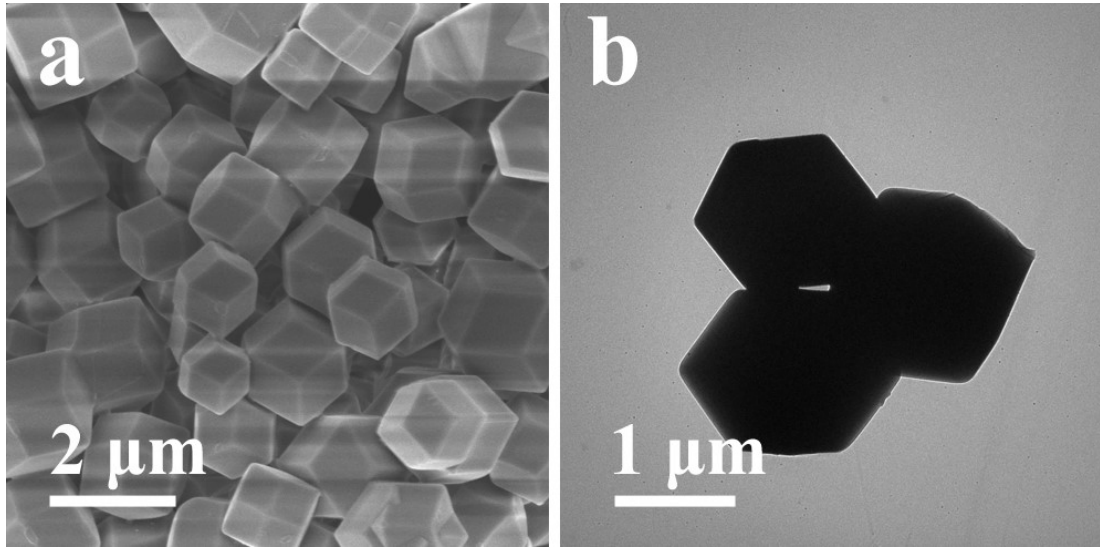

**Fig. S1** SEM (a) and TEM (b) images of ZnCo-ZIF particles.

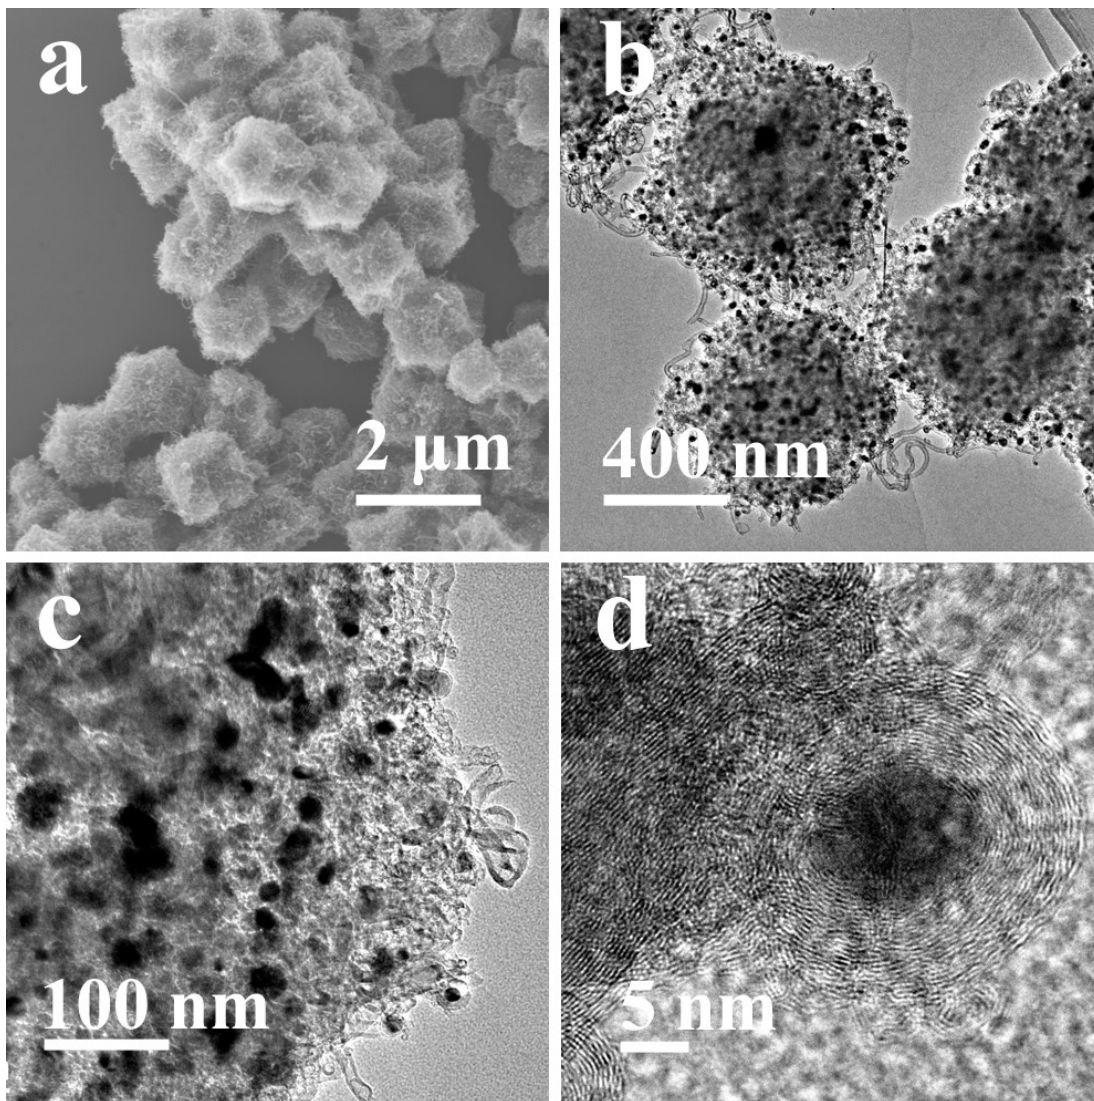

**Fig. S2** SEM (a), TEM (b, c) and HRTEM (d) images of ZnCo-ZIF particle-derived urchin-like carbon (u-CPs).

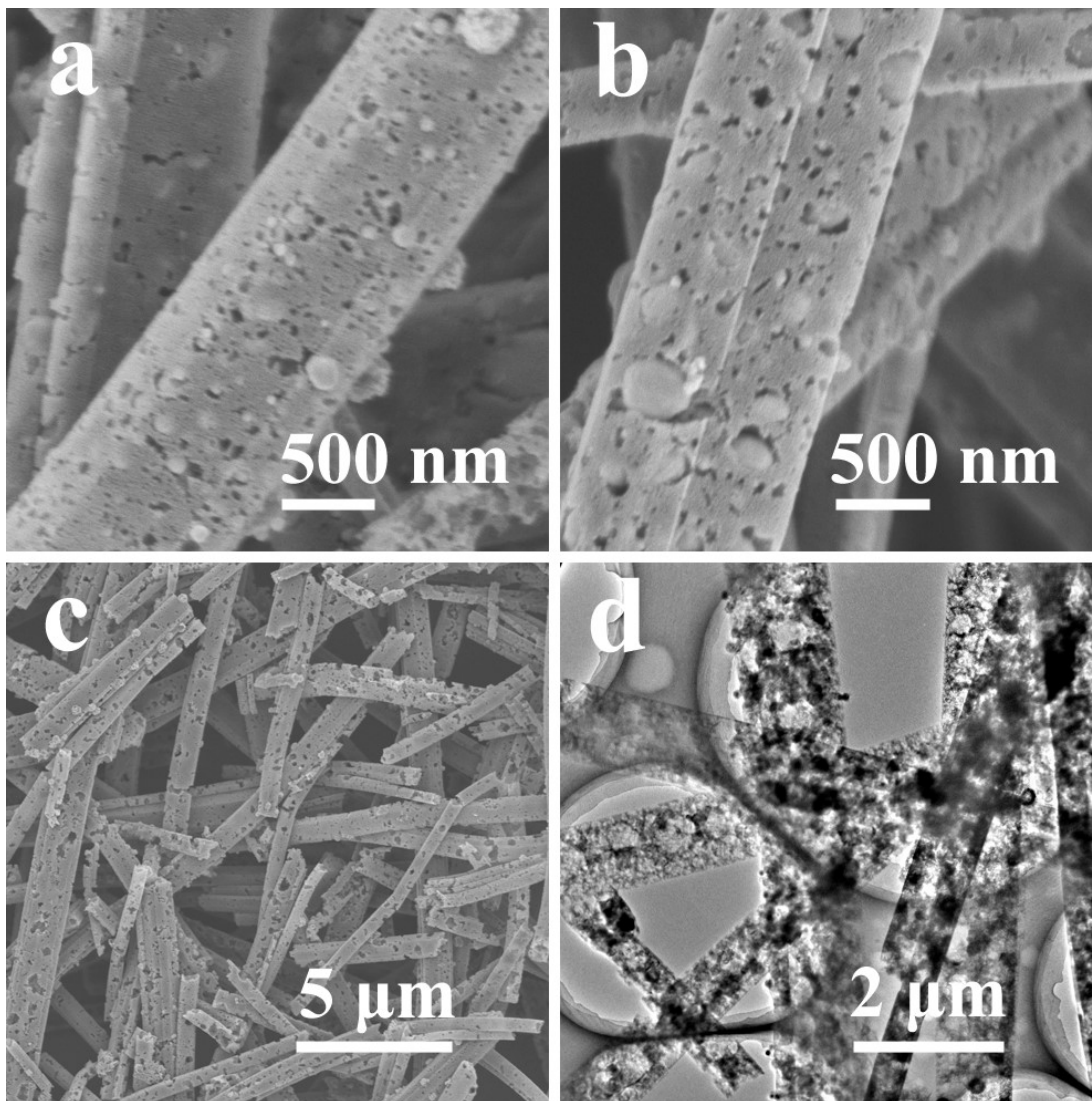

**Fig. S3** SEM images of ZnCo-BTC NW after carbonization treatment but before nitrate acid etching (a, b); SEM (c) and TEM (d) images of ZnCo-BTC NW-derived carbon nanowires (CNWs) after nitrate acid etching.

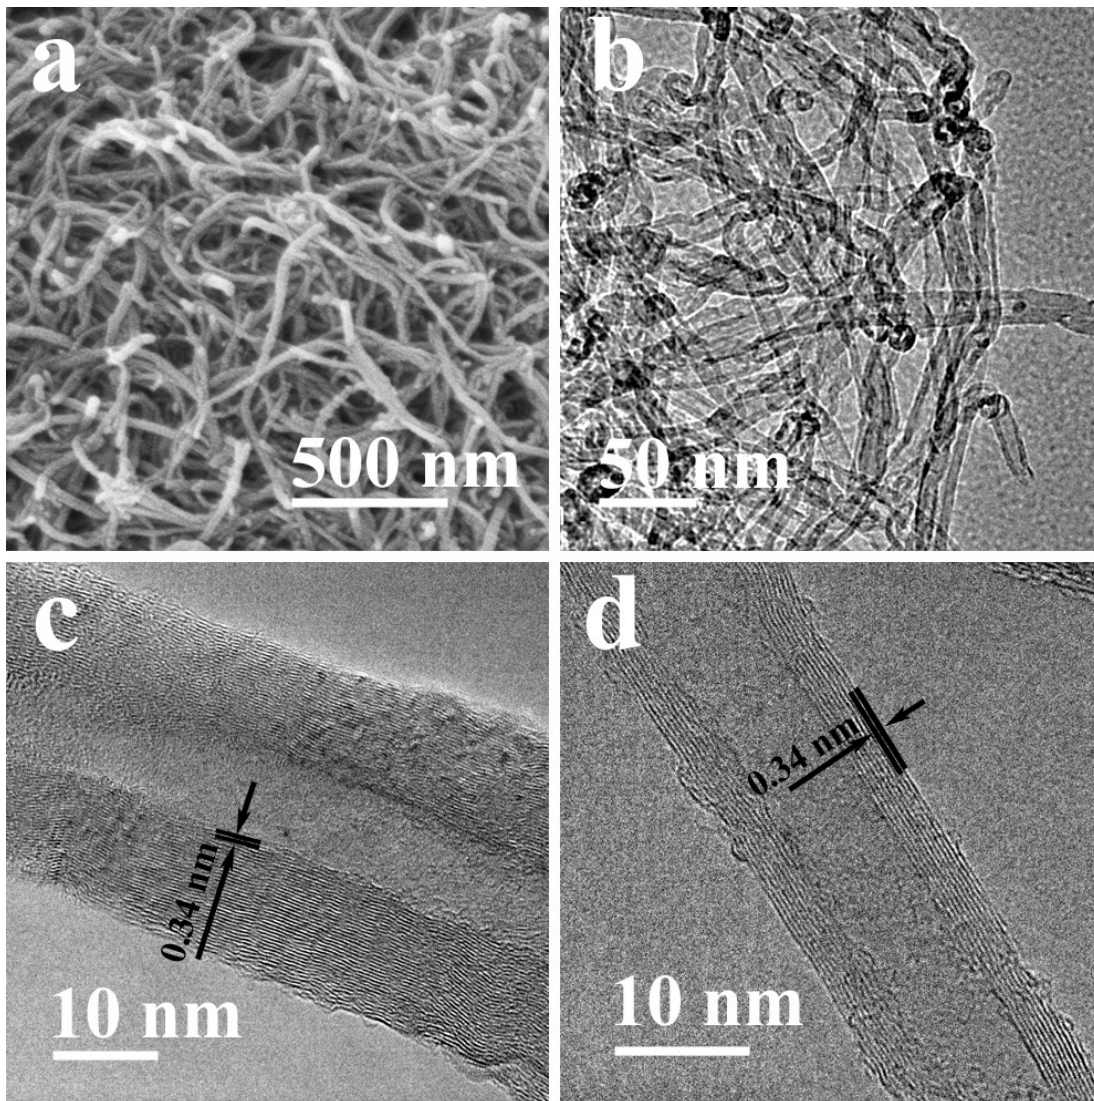

**Fig. S4** SEM (a), TEM (b) and HRTEM (c, d) images of commercial carbon nanotubes (c-CNTs).

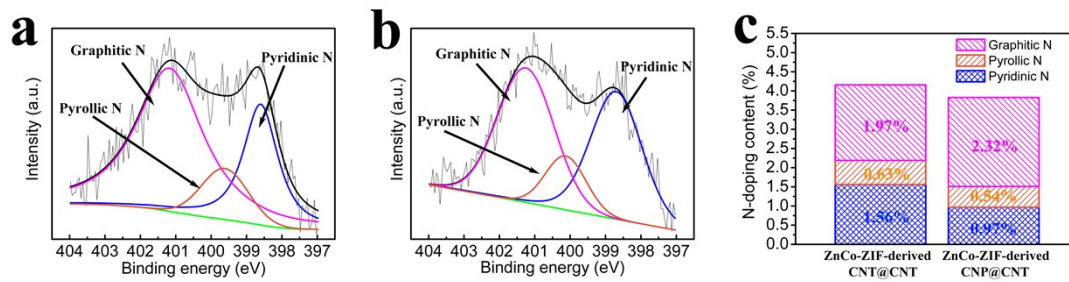

**Fig. S5** The high-resolution XPS spectra of N 1s of u-CPs (a) and br-CNTs (b); the specific N-doping contents of u-CPs and br-CNTs (c).

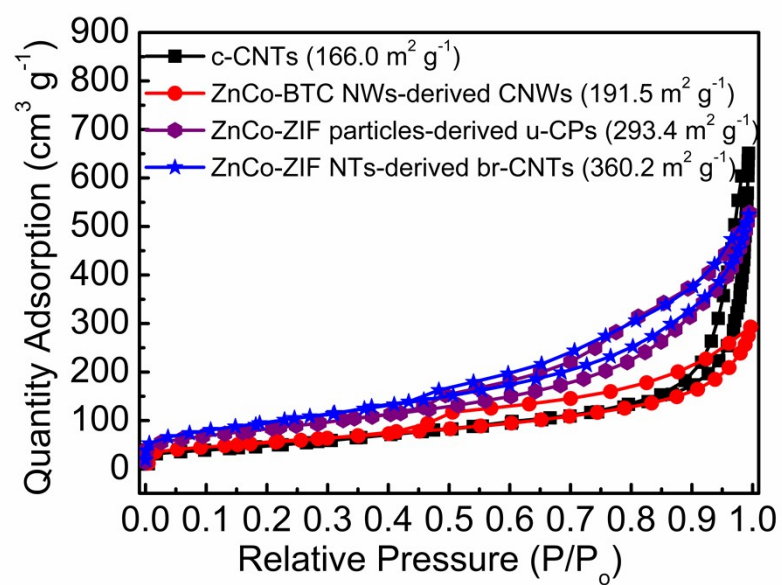

**Fig. S6** Nitrogen adsorption-desorption isotherms of c-CNTs (a), CNWs (b), u-CPs (c) and br-CNTs (d).

**Table S1** Percentage of pores in different size range for c-CNTs, CNWs, u-CPs and br-CNTs.

| <b>Materials</b> | <b><math>\leq 2</math> nm</b> | <b>2 ~ 5 nm</b> | <b>5 ~ 10 nm</b> | <b>10 ~ 50 nm</b> | <b>&gt; 50 nm</b> |
|------------------|-------------------------------|-----------------|------------------|-------------------|-------------------|
| <b>c-CNTs</b>    | 0.44%                         | 11.14%          | 6.79%            | 22.26%            | 59.37%            |
| <b>CNWs</b>      | 2.14%                         | 22.78%          | 15.50%           | 33.04%            | 26.54%            |
| <b>u-CPs</b>     | 1.42%                         | 18.01%          | 18.47%           | 39.67%            | 22.43%            |
| <b>br-CNTs</b>   | 1.19%                         | 22.84%          | 19.79%           | 36.89%            | 19.30%            |



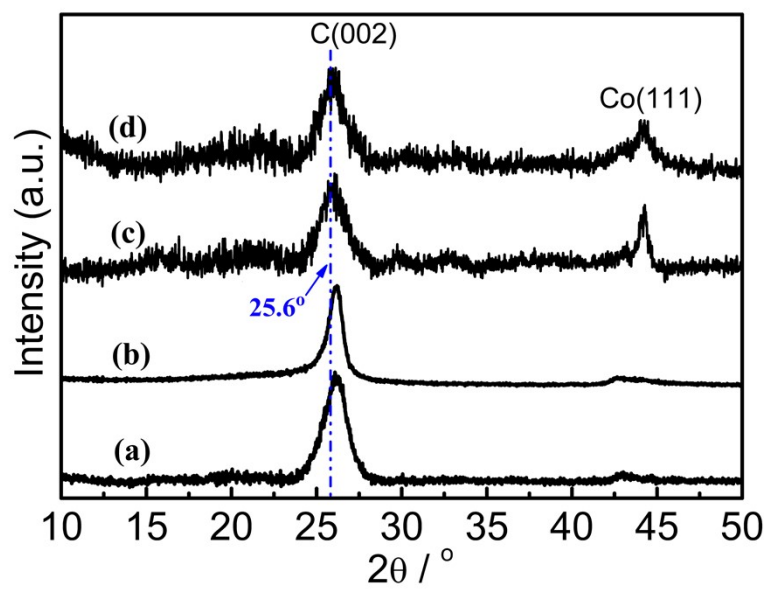

**Fig. S7** XRD patterns of c-CNTs (a), CNWs (b), u-CPs (c) and br-CNTs (d).

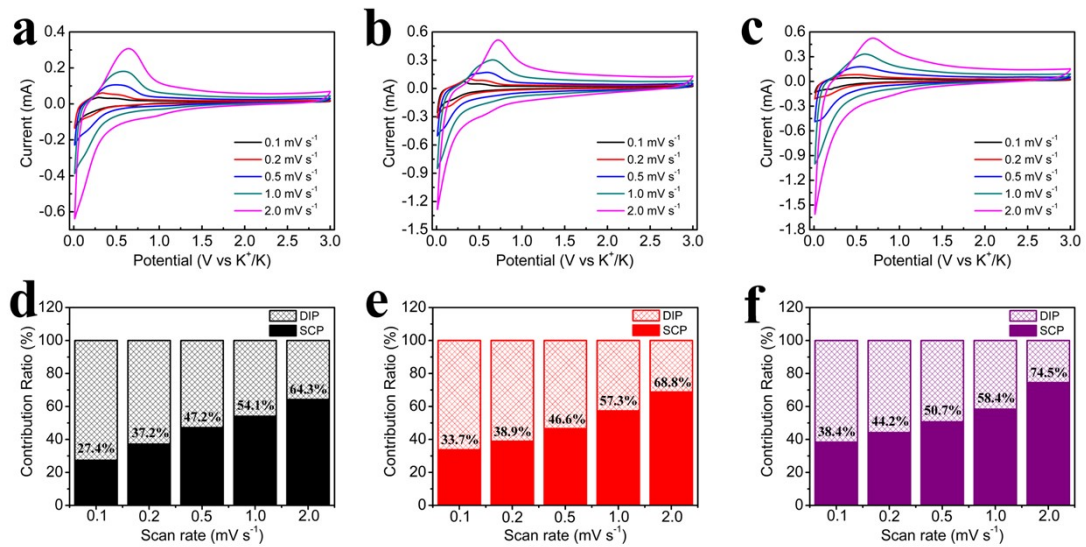

**Fig. S8** CV plots of c-CNTs (a), CNWs (b) and u-CPs (c) at different scan rates; the corresponding contribution ratio of DIP and SCP versus scan rate calculated from CV plots of c-CNTs (d), CNWs (e) and u-CPs (f).

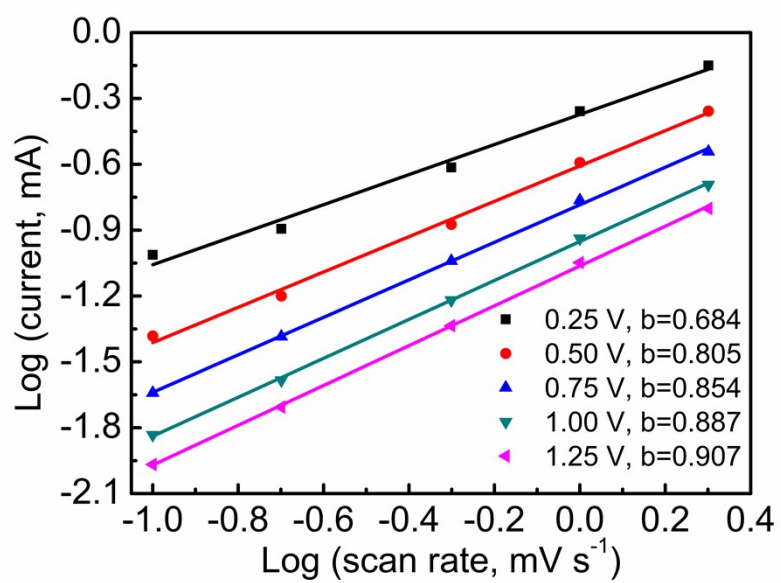

**Fig. S9** The linear relationships between the logarithm current and logarithm scan rate calculated from CV curves of br-CNTs in Fig. 3d.

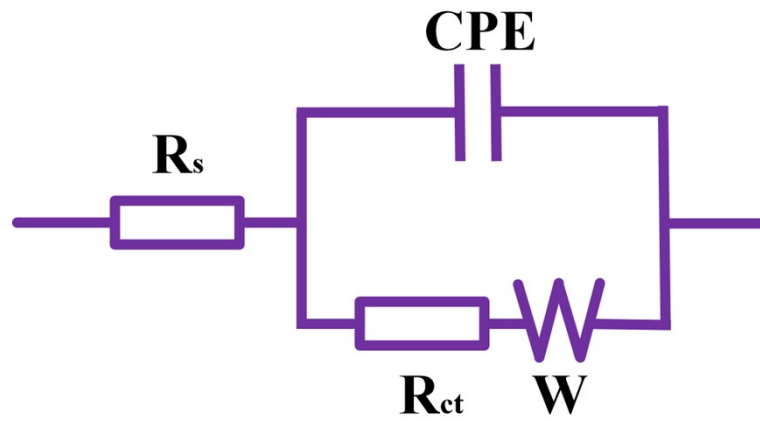

**Fig. S10** The fitting equivalent circuit of Nyquist plots in Fig. 3f, where  $R_s$ ,  $R_{ct}$ , CPE and  $W$  corresponded to series resistance, charge transfer resistance, constant phase element and Warburg impedance, respectively.

**Table S2**  $R_s$ ,  $R_{ct}$  and CPE values fitted from Nyquist plots according to the equivalent circuit in Figure S10.

| <b>Materials</b> | <b><math>R_s</math> (<math>\Omega</math>)</b> | <b><math>R_{ct}</math> (<math>\Omega</math>)</b> | <b>CPE (F)</b> |
|------------------|-----------------------------------------------|--------------------------------------------------|----------------|
| <b>c-CNTs</b>    | 17.01                                         | 6043                                             | 0.000020068    |
| <b>CNWs</b>      | 8.087                                         | 4370                                             | 0.000040941    |
| <b>u-CPs</b>     | 7.317                                         | 3249                                             | 0.000048539    |
| <b>br-CNTs</b>   | 6.667                                         | 2255                                             | 0.000029429    |

**Table S3** K<sup>+</sup> storage properties of MOF-derived materials in recent literature.

| Materials                                                      | Specific Capacity                                   | Rate Capability                                                                                 | Cycling Stability                                 | References                                             |
|----------------------------------------------------------------|-----------------------------------------------------|-------------------------------------------------------------------------------------------------|---------------------------------------------------|--------------------------------------------------------|
| <b>Cu-MOF-derived hollow porous carbon</b>                     | 370 mAh g <sup>-1</sup> at 0.1 A g <sup>-1</sup>    | 190 mAh g <sup>-1</sup> at 1 A g <sup>-1</sup>                                                  | 100 % after 3000 cycles at 1 A g <sup>-1</sup>    | <i>Small</i> , <b>2021</b> , 17, 2100538               |
| <b>Mn-BDC MOFs-derived carbon</b>                              | 266.4 mAh g <sup>-1</sup> at 0.05 A g <sup>-1</sup> | 93 mAh g <sup>-1</sup> at 2 A g <sup>-1</sup> ; 57.2 mAh g <sup>-1</sup> at 5 A g <sup>-1</sup> | 100% after 1000 cycles at 0.2 A g <sup>-1</sup>   | <i>Adv. Funct. Mater.</i> , <b>2020</b> , 30, 2006561  |
| <b>Cu-MOF-derived N-doped porous carbon nanosheets</b>         | 276 mAh g <sup>-1</sup> at 50 mA g <sup>-1</sup>    | 184 mAh g <sup>-1</sup> at 1 A g <sup>-1</sup> ; 157 mAh g <sup>-1</sup> at 2 A g <sup>-1</sup> | 94.5% after 6000 cycles at 1 A g <sup>-1</sup>    | <i>Angew. Chem. Int. Ed.</i> , <b>2020</b> , 59, 19460 |
| <b>LDH/ZIF-67-derived honeycomb-like carbon</b>                | 367.1 mAh g <sup>-1</sup> at 0.05 A g <sup>-1</sup> | 162.7 mAh g <sup>-1</sup> at 2 A g <sup>-1</sup>                                                | 67.9% after 200 cycles at 1 A g <sup>-1</sup>     | <i>Chem. Eng. J.</i> , <b>2020</b> , 384: 123328       |
| <b>Macroporous ZIF-8 single crystal-derived N-doped carbon</b> | 345 mAh g <sup>-1</sup> at 0.1 A g <sup>-1</sup>    | 180 mAh g <sup>-1</sup> at 1 A g <sup>-1</sup> ; 94 mAh g <sup>-1</sup> at 10 A g <sup>-1</sup> | 105.4% after 12000 cycles at 2 A g <sup>-1</sup>  | <i>Nano Lett.</i> , <b>2019</b> , 19, 4965             |
| <b>MIL-100-derived S/N co-doped thin carbon</b>                | 320 mAh g <sup>-1</sup> at 50 mA g <sup>-1</sup>    | 91.2 mAh g <sup>-1</sup> at 2 A g <sup>-1</sup>                                                 | 71.3% after 900 cycles at 2 A g <sup>-1</sup>     | <i>Adv. Mater.</i> , <b>2019</b> , 31, 1805430         |
| <b>ZIF-8-derived N-doped meso-macro porous carbon</b>          | 312 mAh g <sup>-1</sup> at 0.2 C                    | 117 mAh g <sup>-1</sup> at 21 C                                                                 | 93.2 % after 2000 cycles at 2 A g <sup>-1</sup>   | <i>J. Mater. Chem. A</i> , <b>2019</b> , 7, 21966      |
| <b>Cu-BTC-derived N/O co-doped carbon</b>                      | 354 mAh g <sup>-1</sup> at 50 mA g <sup>-1</sup>    | 110 mAh g <sup>-1</sup> at 1 A g <sup>-1</sup>                                                  | 90.9% after 1300 cycles at 1 A g <sup>-1</sup>    | <i>J. Mater. Chem. A</i> , <b>2019</b> , 7, 12317      |
| <b>Co-HMT-derived carbon nanosheets</b>                        | 311 mAh g <sup>-1</sup> at 0.1 A g <sup>-1</sup>    | 168 mAh g <sup>-1</sup> at 2 A g <sup>-1</sup>                                                  | 96% after 10000 cycles at 5 A g <sup>-1</sup>     | <i>J. Mater. Chem. A</i> , <b>2019</b> , 7, 18499      |
| <b>MIL-101-derived N/O-doped hard carbon</b>                   | 365 mAh g <sup>-1</sup> at 25 mA g <sup>-1</sup>    | 118 mAh g <sup>-1</sup> at 3 A g <sup>-1</sup>                                                  | 69.5% after 1100 cycles at 1.05 A g <sup>-1</sup> | <i>Adv. Mater.</i> , <b>2018</b> , 30, 1700104         |
| <b>ZIF-67-derived high pyridine N-doped porous carbon</b>      | 359.6 mAh g <sup>-1</sup> at 0.2 A g <sup>-1</sup>  | 207.8 mAh g <sup>-1</sup> at 2 A g <sup>-1</sup>                                                | ≈ 71% after 2000 cycles at 0.5 A g <sup>-1</sup>  | <i>J. Mater. Chem. A</i> , <b>2018</b> , 6, 17959      |
| <b>ZIF-67-derived porous carbon</b>                            | 587.6 mAh g <sup>-1</sup> at 50 mA g <sup>-1</sup>  | 186.2 mAh g <sup>-1</sup> at 2 A g <sup>-1</sup>                                                | 39.4% after 2000 cycles at 0.5 A g <sup>-1</sup>  | <i>J. Mater. Chem. A</i> , <b>2018</b> , 6, 17959      |
| <b>Zn-MOF@Co-MOF nanosheet-derived</b>                         | 310 mA h g <sup>-1</sup> at 100 mA g <sup>-1</sup>  | 170 mAh g <sup>-1</sup> at 2 A g <sup>-1</sup> ; 120 mAh g <sup>-1</sup> at 5 A g <sup>-1</sup> | 89.3% after 5200 cycles at 1 A g <sup>-1</sup>    | <i>J. Mater. Chem. A</i> , <b>2019</b> , 7, 19929      |

| carbon                                                            |                                                                                                          |                                                                                                     |                                                                               |                                                          |
|-------------------------------------------------------------------|----------------------------------------------------------------------------------------------------------|-----------------------------------------------------------------------------------------------------|-------------------------------------------------------------------------------|----------------------------------------------------------|
| <b>Al-MIL-NH<sub>2</sub> nanorod-derived N-doped carbon</b>       | 305 mA h g <sup>-1</sup> at 100 mA g <sup>-1</sup>                                                       | 202 mAh g <sup>-1</sup> at 1 A g <sup>-1</sup> ; 162 mAh g <sup>-1</sup> at 6 A g <sup>-1</sup>     | ~ 100% after 500 cycles at 6 A g <sup>-1</sup>                                | <i>Small</i> , <b>2021</b> , 17, 2100135                 |
| <b>MIL-88A-derived S-doped carbon</b>                             | 358.4 mAh g <sup>-1</sup> at 50 mA g <sup>-1</sup>                                                       | 192.6 mAh g <sup>-1</sup> at 2 A g <sup>-1</sup>                                                    | 90.9% after 700 cycles at 1 A g <sup>-1</sup>                                 | <i>ACS Appl. Energy Mater.</i> , <b>2021</b> , 4, 2282   |
| <b>ZIF-67-derived N-doped carbon nanotubes</b>                    | 254.7 mAh g <sup>-1</sup> at 50 mA g <sup>-1</sup>                                                       | 180 mAh g <sup>-1</sup> at 0.5 A g <sup>-1</sup> ; 131 mAh g <sup>-1</sup> at 2 A g <sup>-1</sup>   | 77.86% after 500 cycles at 2 A g <sup>-1</sup>                                | <i>ChemSusChem</i> , <b>2018</b> , 11, 202               |
| <b>Bi-MOF-derived carbon film@carbon nanorods@Bi nanoparticle</b> | 425 mAh g <sup>-1</sup> at 0.1 A g <sup>-1</sup>                                                         | 140 mAh g <sup>-1</sup> at 1 A g <sup>-1</sup>                                                      | 74.8% after 700 cycles at 1 A g <sup>-1</sup>                                 | <i>ACS Appl. Energy Mater.</i> , <b>2019</b> , 11, 22474 |
| <b>ZIF-67-derived open ZnSe/C nanocages</b>                       | 318 mAh g <sup>-1</sup> at 0.05 A g <sup>-1</sup>                                                        | 205 mAh g <sup>-1</sup> at 0.5 A g <sup>-1</sup>                                                    | 92.19% after 400 cycles at 0.5 A g <sup>-1</sup>                              | <i>J. Mater. Chem. A</i> , <b>2020</b> , 8, 779          |
| <b>ZIF-8@ZIF-67-derived N-doped CoP/C polyhedron</b>              | 310 mAh g <sup>-1</sup> at 0.1 A g <sup>-1</sup>                                                         | 220 mAh g <sup>-1</sup> at 1A g <sup>-1</sup>                                                       | 70% after 800 cycles at 0.5 A g <sup>-1</sup>                                 | <i>Small</i> , <b>2020</b> , 16, 1906566                 |
| <b>ZIF-67-derived N-doped carbon/CoSe nanocubes</b>               | 388.7 mAh g <sup>-1</sup> at 0.1 A g <sup>-1</sup>                                                       | 365.9 mAh g <sup>-1</sup> at 2 A g <sup>-1</sup>                                                    | 84.6% after 500 cycles at 2 A g <sup>-1</sup>                                 | <i>J. Colloid Interf. Sci.</i> , <b>2021</b> , 604, 157  |
| <b>ZIF-67-derived Co<sub>0.85</sub>Se@C nanofibers</b>            | 364 mAh g <sup>-1</sup> at 0.2 A g <sup>-1</sup>                                                         | 303 mAh g <sup>-1</sup> at 2 A g <sup>-1</sup>                                                      | 87.42% after 400 cycles at 1 A g <sup>-1</sup>                                | <i>Energy Storage Mater.</i> , <b>2020</b> , 24, 167     |
| <b>ZIF-67-derived CoP/reduced graphene oxide</b>                  | 360 mAh g <sup>-1</sup> at 0.1 A g <sup>-1</sup>                                                         | 189 mAh g <sup>-1</sup> at 1 A g <sup>-1</sup> ; 155 mAh g <sup>-1</sup> at 2 A g <sup>-1</sup>     | 93.65% after 2800 cycles at 1 A g <sup>-1</sup>                               | <i>J. Colloid Interf. Sci.</i> , <b>2021</b> , 604, 319  |
| <b>ZnCo-ZIF-derived branched carbon nanotubes</b>                 | 450.2 mAh g <sup>-1</sup> at 0.05 A g <sup>-1</sup> ; 348.0 mAh g <sup>-1</sup> at 0.1 A g <sup>-1</sup> | 199.5 mAh g <sup>-1</sup> at 1 A g <sup>-1</sup> ; 147.2 mAh g <sup>-1</sup> at 2 A g <sup>-1</sup> | 91.6%, 86.9% and 84.5% after 500, 1000 and 1300 cycles at 2 A g <sup>-1</sup> | <b>This work</b>                                         |

**Table S4** K<sup>+</sup> storage properties of other carbon materials in recent literature.

| Materials                                                 | Specific Capacity                                   | Rate Capability                                                                                     | Cycling Stability                                  | References                                            |
|-----------------------------------------------------------|-----------------------------------------------------|-----------------------------------------------------------------------------------------------------|----------------------------------------------------|-------------------------------------------------------|
| <b>N-doped carbon spheres</b>                             | 363.7 mAh g <sup>-1</sup> at 0.05 A g <sup>-1</sup> | 107.9 mAh g <sup>-1</sup> at 5 A g <sup>-1</sup>                                                    | 56.8 % after 3600 cycles at 1 A g <sup>-1</sup>    | <i>Nano-Micro Lett.</i> , <b>2021</b> , 13, 174       |
| <b>Gelatin-derived carbon</b>                             | 132 mAh g <sup>-1</sup> at 0.1 A g <sup>-1</sup>    | 53.8 mAh g <sup>-1</sup> at 1 A g <sup>-1</sup>                                                     | 89.3 % after 300 cycles at 0.2 A g <sup>-1</sup>   | <i>Carbon</i> , <b>2021</b> , 178, 775-782            |
| <b>O-rich carbon nanosheets</b>                           | 392 mAh g <sup>-1</sup> at 0.05 A g <sup>-1</sup>   | 174 mAh g <sup>-1</sup> at 2 A g <sup>-1</sup>                                                      | ≈ 128.5 % after 2500 cycles at 2 A g <sup>-1</sup> | <i>Nanoscale</i> , <b>2021</b> , 13, 2389             |
| <b>P/N co-doped porous carbon monoliths</b>               | 437 mA h g <sup>-1</sup> at 0.05 A g <sup>-1</sup>  | 205 mA h g <sup>-1</sup> at 2 A g <sup>-1</sup>                                                     | 84.2 % after 3000 cycles at 1 A g <sup>-1</sup>    | <i>ACS Nano</i> , <b>2020</b> , 14, 14057             |
| <b>N/O dual-doped hard carbon</b>                         | 439.1 mAh g <sup>-1</sup> at 100 mA g <sup>-1</sup> | 254.4 mAh g <sup>-1</sup> at 1 A g <sup>-1</sup> ; 223.4 mAh g <sup>-1</sup> at 2 A g <sup>-1</sup> | 74.5% after 5000 cycles at 1 A g <sup>-1</sup>     | <i>Adv. Sci.</i> , <b>2020</b> , 7, 1902547           |
| <b>N/S dual-doped graphitic hollow architectures</b>      | ≈ 220 mAh g <sup>-1</sup> at 500 mA g <sup>-1</sup> | 192 mAh g <sup>-1</sup> at 1 A g <sup>-1</sup> ; 155 mAh g <sup>-1</sup> at 2 A g <sup>-1</sup>     | 90.2% after 5000 cycles at 5 A g <sup>-1</sup>     | <i>Adv. Energy Mater.</i> , <b>2020</b> , 10, 2001161 |
| <b>Polyaniline-co-poly pyrrole-derived N-doped carbon</b> | 423 mAh g <sup>-1</sup> at 50 mA g <sup>-1</sup>    | 195 mAh g <sup>-1</sup> at 1 A g <sup>-1</sup> ; 148 mAh g <sup>-1</sup> at 2 A g <sup>-1</sup>     | 93.8% after 660 cycles at 0.2 A g <sup>-1</sup>    | <i>Angew. Chem. Int. Ed.</i> , <b>2020</b> , 59, 4448 |
| <b>Superabsorbent polymers-derived porous carbon</b>      | 291.9 mAh g <sup>-1</sup> at 50 mA g <sup>-1</sup>  | 151.4 mAh g <sup>-1</sup> at 1 A g <sup>-1</sup> ; 136.7 mAh g <sup>-1</sup> at 2 A g <sup>-1</sup> | 106.8% after 2000 cycles at 1 A g <sup>-1</sup>    | <i>J. Power Sources</i> , <b>2020</b> , 451, 227727   |
| <b>Nitrogen-doped turbostratic carbon</b>                 | 518 mAh g <sup>-1</sup> at 50 mA g <sup>-1</sup>    | 212 mAh g <sup>-1</sup> at 2 A g <sup>-1</sup> ; 119 mAh g <sup>-1</sup> at 5 A g <sup>-1</sup>     | 93.1% after 500 cycles at 1 A g <sup>-1</sup>      | <i>Adv. Mater.</i> , <b>2020</b> , 32, 2000732        |
| <b>Crustacean-derived porous hard carbon nanobelts</b>    | 468 mAh g <sup>-1</sup> at 50 mA g <sup>-1</sup>    | 235 mAh g <sup>-1</sup> at 1.6 A g <sup>-1</sup>                                                    | ≈ 100% after 1600 cycles at 1 A g <sup>-1</sup>    | <i>Nano Energy</i> , <b>2020</b> , 77, 105018         |
| <b>Silicon carbide - derived carbon</b>                   | 289.9 mAh g <sup>-1</sup> at 100 mA g <sup>-1</sup> | 197.3 mAh g <sup>-1</sup> at 1 A g <sup>-1</sup>                                                    | 89.3% after 1000 cycles at 1 A g <sup>-1</sup>     | <i>Adv. Funct. Mater.</i> , <b>2020</b> , 30, 2004348 |
| <b>Pitch-derived carbon</b>                               | 290 mAh g <sup>-1</sup> at 0.1 A g <sup>-1</sup>    | 146 mAh g <sup>-1</sup> at 2 A g <sup>-1</sup>                                                      | 80 % after 2000 cycles at 1 A g <sup>-1</sup>      | <i>Carbon</i> , <b>2021</b> , 176, 383                |



|                                                   |                                                                                                          |                                                                                                     |                                                                               |                                                       |
|---------------------------------------------------|----------------------------------------------------------------------------------------------------------|-----------------------------------------------------------------------------------------------------|-------------------------------------------------------------------------------|-------------------------------------------------------|
| <b>Acetonitrile-derived porous carbon</b>         | 271 mAh g <sup>-1</sup> at 50 mA g <sup>-1</sup>                                                         | 135 mAh g <sup>-1</sup> at 1 A g <sup>-1</sup> ; 98 mAh g <sup>-1</sup> at 5 A g <sup>-1</sup>      | 82% after 600 cycles at 0.1 A g <sup>-1</sup>                                 | <i>J. Power Sources</i> , <b>2020</b> , 466, 228303   |
| <b>N/F dual doped soft carbon nanofibers</b>      | 262 mAh g <sup>-1</sup> at 0.1 A g <sup>-1</sup>                                                         | 146 mAh g <sup>-1</sup> at 5 A g <sup>-1</sup>                                                      | 78.5 % after 1000 cycles at 1 A g <sup>-1</sup>                               | <i>Small</i> , <b>2021</b> , 17, 2101576              |
| <b>Ni-EDTA-derived N-doped carbon</b>             | 369 mAh g <sup>-1</sup> at 50 mA g <sup>-1</sup>                                                         | 152 mAh g <sup>-1</sup> at 1 A g <sup>-1</sup> ; 123 mAh g <sup>-1</sup> at 2 A g <sup>-1</sup>     | 82% after 200 cycles at 0.2 A g <sup>-1</sup>                                 | <i>Adv. Funct. Mater.</i> , <b>2019</b> , 29, 1903641 |
| <b>Gelatin-derived carbon</b>                     | 132 mAh g <sup>-1</sup> at 0.1 A g <sup>-1</sup>                                                         | 53.8 mAh g <sup>-1</sup> at 1 A g <sup>-1</sup>                                                     | 89.3 % after 300 cycles at 0.2 A g <sup>-1</sup>                              | <i>Carbon</i> , <b>2021</b> , 178, 775                |
| <b>Amorphous ordered mesoporous carbon</b>        | 286.4 mAh g <sup>-1</sup> at 50 mA g <sup>-1</sup>                                                       | 144.2 mAh g <sup>-1</sup> at 1 A g <sup>-1</sup>                                                    | 101.6% after 1000 cycles at 1 A g <sup>-1</sup>                               | <i>Adv. Energy Mater.</i> , <b>2018</b> , 8, 1701648  |
| <b>Spent asphalt-derived mesoporous carbon</b>    | 289 mAh g <sup>-1</sup> at 0.1 A g <sup>-1</sup>                                                         | 197.3 mAh g <sup>-1</sup> at 1 A g <sup>-1</sup>                                                    | 89.3 % after 1000 cycles at 1 A g <sup>-1</sup>                               | <i>Adv. Funct. Mater.</i> , <b>2020</b> , 30, 2004348 |
| <b>Soybeans-derived hard carbon</b>               | 175 mAh g <sup>-1</sup> at 0.05 A g <sup>-1</sup>                                                        | 70 mAh g <sup>-1</sup> at 0.8 A g <sup>-1</sup>                                                     | ≈ 100 % after 900 cycles at 0.05 A g <sup>-1</sup>                            | <i>J. Power Sources</i> , <b>2020</b> , 463, 228172   |
| <b>PPy-derived N-doped carbon nanofiber</b>       | 238 mAh g <sup>-1</sup> at 100 mA g <sup>-1</sup>                                                        | 172 mAh g <sup>-1</sup> at 1 A g <sup>-1</sup> ; 153 mAh g <sup>-1</sup> at 2 A g <sup>-1</sup>     | 95.3% after 2000 cycles at 1 A g <sup>-1</sup>                                | <i>Nat. Commun.</i> , <b>2018</b> , 9, 1720.          |
| <b>Pitch-derived soft carbon</b>                  | 461.2 mAh g <sup>-1</sup> at 0.1 A g <sup>-1</sup>                                                       | 224 mAh g <sup>-1</sup> at 1 A g <sup>-1</sup>                                                      | 70 % after 1000 cycles at 1 A g <sup>-1</sup>                                 | <i>Carbon</i> , <b>2019</b> , 155, 601                |
| <b>Sycamore leaves-derived carbon microtube</b>   | 432 mAh g <sup>-1</sup> at 0.2 A g <sup>-1</sup>                                                         | 273.6 mAh g <sup>-1</sup> at 1 A g <sup>-1</sup>                                                    | 92.48 % after 100 cycles at 0.5 A g <sup>-1</sup>                             | <i>J. Mater. Chem. A</i> , <b>2019</b> , 7, 25845     |
| <b>Hierarchically N-doped porous carbon</b>       | 381.7 mAh g <sup>-1</sup> at 0.05 A g <sup>-1</sup>                                                      | 185.0 mAh g <sup>-1</sup> at 10 A g <sup>-1</sup>                                                   | 86.0% after 1000 cycles at 2.0 A g <sup>-1</sup>                              | <i>Adv. Energy Mater.</i> , <b>2018</b> , 8, 1802386  |
| <b>ZnCo-ZIF-derived branched carbon nanotubes</b> | 450.2 mAh g <sup>-1</sup> at 0.05 A g <sup>-1</sup> ; 348.0 mAh g <sup>-1</sup> at 0.1 A g <sup>-1</sup> | 199.5 mAh g <sup>-1</sup> at 1 A g <sup>-1</sup> ; 147.2 mAh g <sup>-1</sup> at 2 A g <sup>-1</sup> | 91.6%, 86.9% and 84.5% after 500, 1000 and 1300 cycles at 2 A g <sup>-1</sup> | <b>This work</b>                                      |
